# Supplementary material for: Predicting unrecognized enhancer-mediated genome topology by an ensemble machine learning model
Source: HighWire-hosted journal article supplement (doi:10.1101/gr.264606.120), 2020-11-12
Supplement: Supplemental_Fig_S1.pdf [file Supplemental_Fig_S1.pdf]

## Supplemental figure S1

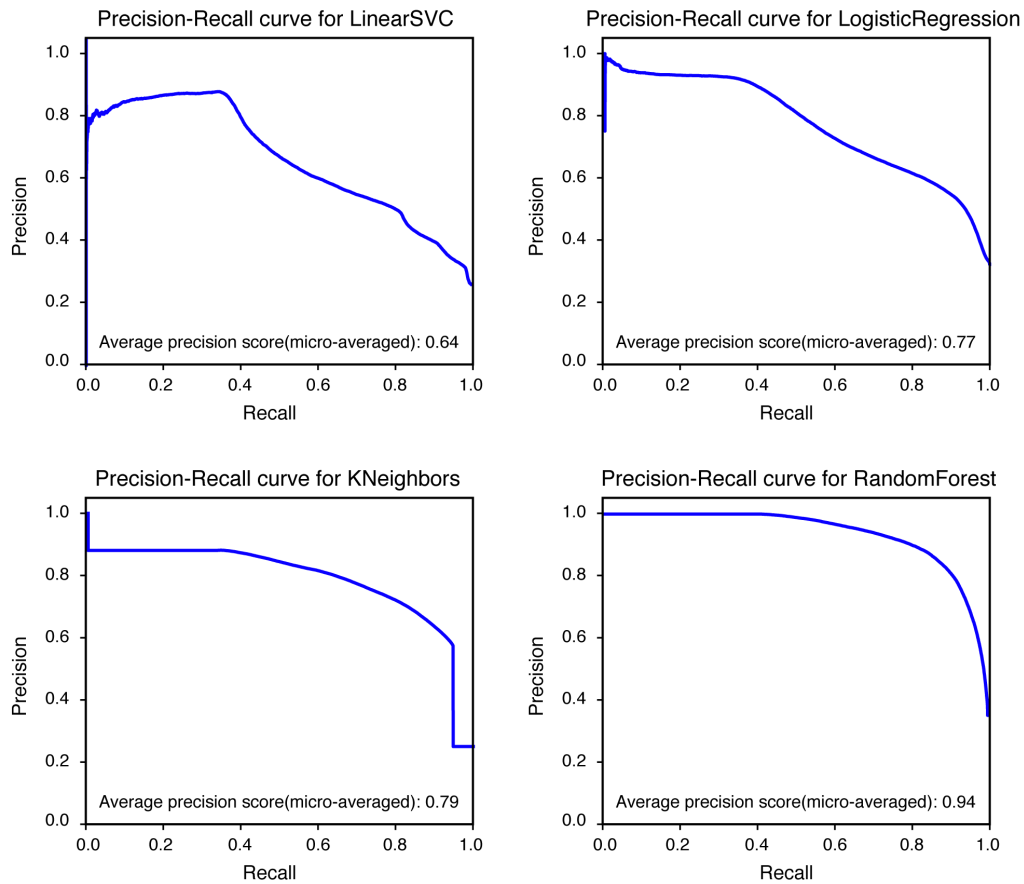

**Figure S1. Precision-Recall curve for four standard classifiers.** ATP conducted a multiclass classification task, here we employed precision-recall curve and micro-average precision score to show the classification performance, the Random forest model outperformed other standard classification models with the highest precision score of 0.94.
