# Supplementary material for: Predicting unrecognized enhancer-mediated genome topology by an ensemble machine learning model
Source: HighWire-hosted journal article supplement (doi:10.1101/gr.264606.120), 2020-11-12
Supplement: Supplemental_Fig_S6.pdf [file Supplemental_Fig_S6.pdf]

## Supplemental figure S6

A

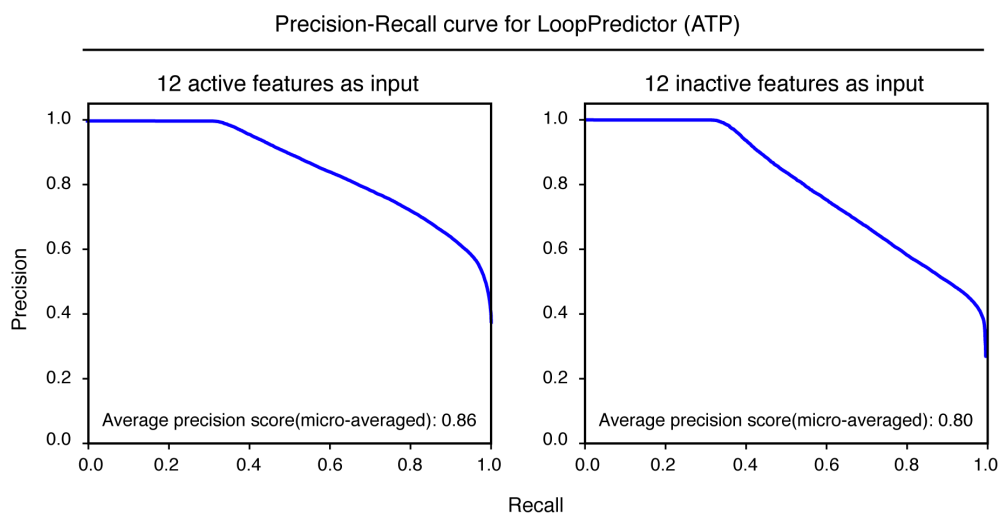

B

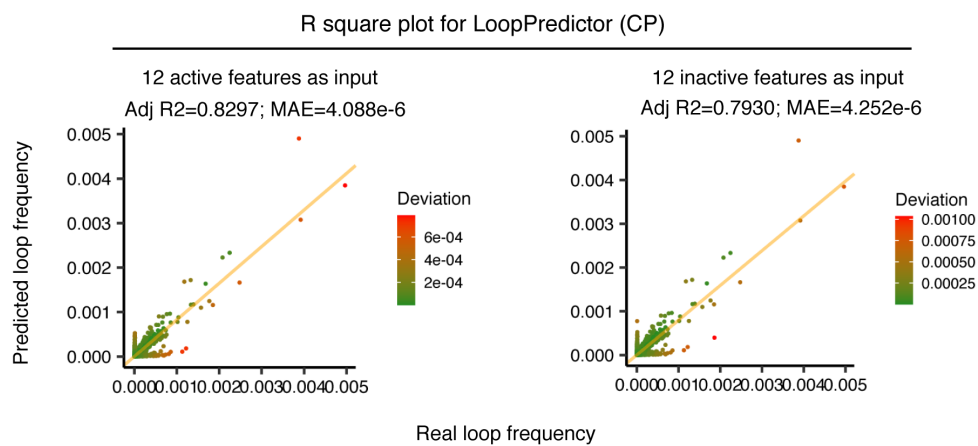

**Figure S6.** (A) Precision-Recall curve for LoopPredictor in active, and inactive features. (B) R square evaluation and Mean Absolute Error (MAE) values.
